# Supplementary material
Source: MDPI journal article supplement (https://www.mdpi.com/2220-9964/11/2/138)
Supplement: s1 [file s1]

## Difficulty of the test

1) I found the test: *easy – moderately difficult – difficult*

I found the tasks focused on hypsometric tints: *easy – moderately difficult – difficult*

I found the tasks focused on topography: *easy – moderately difficult – difficult*

I found the tasks focused on graphic scale: *easy – moderately difficult – difficult*

I found the tasks focused on coordinate grid: *easy – moderately difficult – difficult*

2) How and why did the task demand affect the difficulty of the tasks (hypsometric tints, topography/symbols, distance/graphic scale a cardinal direction/coordinate grid)?

## Incorrectly solved tasks

If you answered incorrectly any of the tasks, look at the given task(s) in the assignment sheet, please. Write what in your opinion caused the error. You may find the map helpful in finding the cause of the error. If you had more than one incorrect answer, please write the code of the incorrectly solved task stated on the assignment sheet so that we know which incorrect answer you were explaining.

## Working with individual elements

Each task can be divided into several elements (see figure below).

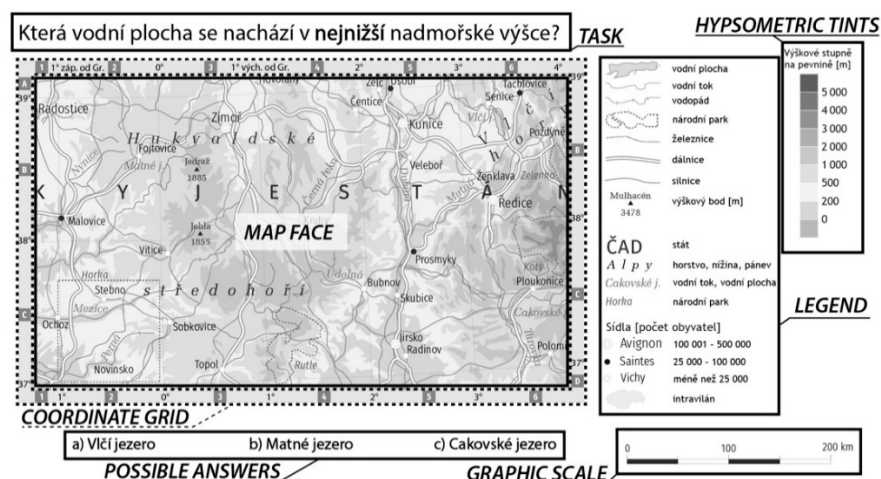

1) Circle the element(s) that you did not work with during the test and explain why.

*task assignment      map face      legend      hypsometric tints      coordinate grid      graphic scale*

2) Circle the element(s) that you used only for some tasks. Write for which task demand you did/did not use it/them and fill in reasons why.

*task assignment      map face      legend      hypsometric tints      coordinate grid      graphic scale*

3) Circle the element(s) you had to return to during the solution of the problem. Write why it was necessary to return to it/them and whether the task demand or the map influenced this.

*task assignment      map face      legend      hypsometric tints      coordinate grid      graphic scale*

4) Have you always read all the available answers? Why?/Why not?

## Task solving procedure

Each person can choose a different way of working with the individual elements. For the following questions, draw up a diagram (see example below) for each task demand.

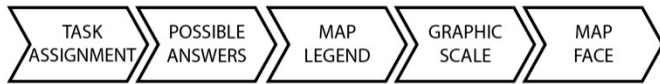

You can write each element only once (if you haven't used an element, don't include it, if you have used an element more than once, write it in the diagram where you used it the first time).

Use the following elements: *map face*; *possible answers*; *map legend*; *graphic scale*; *hypsometric tints*; *coordinate grid*.

If you proceeded in more than one way during the task solving, create diagrams for the two most used procedures.

1) Follow the example above to create a diagram of the task-solving process for the tasks focused on **elevation** (altitude).

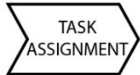

2) Follow the example and create a diagram of the task-solving process for the tasks focused on **topography/symbols**.

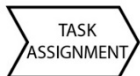

3) Follow the example and create a diagram of the task-solving process for the tasks focused on **scale** (distance).

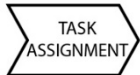

4) Follow the example and create a diagram of the task-solving process for the tasks focused on **coordinate grid** (cardinal direction).

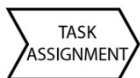

5) Why did the task demand (elevation vs. topography vs. scale vs. coordinate grid) affect your task-solving process?

6) How and why did your procedure changed during the test?
